# Supplementary material for: Total Meniscus Reconstruction Using a Polymeric Hybrid-Scaffold: Combined with 3D-Printed Biomimetic Framework and Micro-Particle
Source: MDPI journal article supplement (doi:10.3390/polym13121910), 2021-06-08
Supplement: s1 [file s1]

## Supplementary Data

# Total Meniscus Reconstruction Using a Hybrid-Scaffold: Combined with 3D-printed Biomimetic Framework and Micro-Particle

Hun-Jin Jeong<sup>1,#</sup>, Se-Won Lee<sup>2,#</sup>, Myoung Wha Hong<sup>3</sup>, Young Yul Kim<sup>3</sup>, Kyoung Duck Seo<sup>1,\*</sup>, Young-Sam Cho<sup>1,4,\*</sup> and Seung-Jae Lee<sup>1,4,\*</sup>

<sup>1</sup>Department of Mechanical Engineering, College of Engineering, Wonkwang University, 460 Iksandae-ro, Iksan, Jeonbuk, 54538, Republic of Korea

<sup>2</sup>Department of Orthopedics, Seoul St. Mary's Hospital, Catholic University of Korea, 10, 63-ro, Yeongeungpo-gu, Seoul, 07345, Republic of Korea

<sup>3</sup>Department of Orthopedics, Daejeon St. Mary's Hospital, Catholic University of Korea, 64, Daeheung-ro, Jung-gu, Daejeon, 34943, Republic of Korea

<sup>4</sup>Department of Mechanical and Design Engineering, College of Engineering, Wonkwang University, 460 Iksandae-ro, Iksan, Jeonbuk, 54538, Republic of Korea

<sup>#</sup>These authors contributed equally to this work.

\*Co-correspondence to K.D.S (kdseo85@wku.ac.kr), Y.-S. C (youngsamcho@wku.ac.kr) and S.-J. L. (sjlee411@wku.ac.kr)

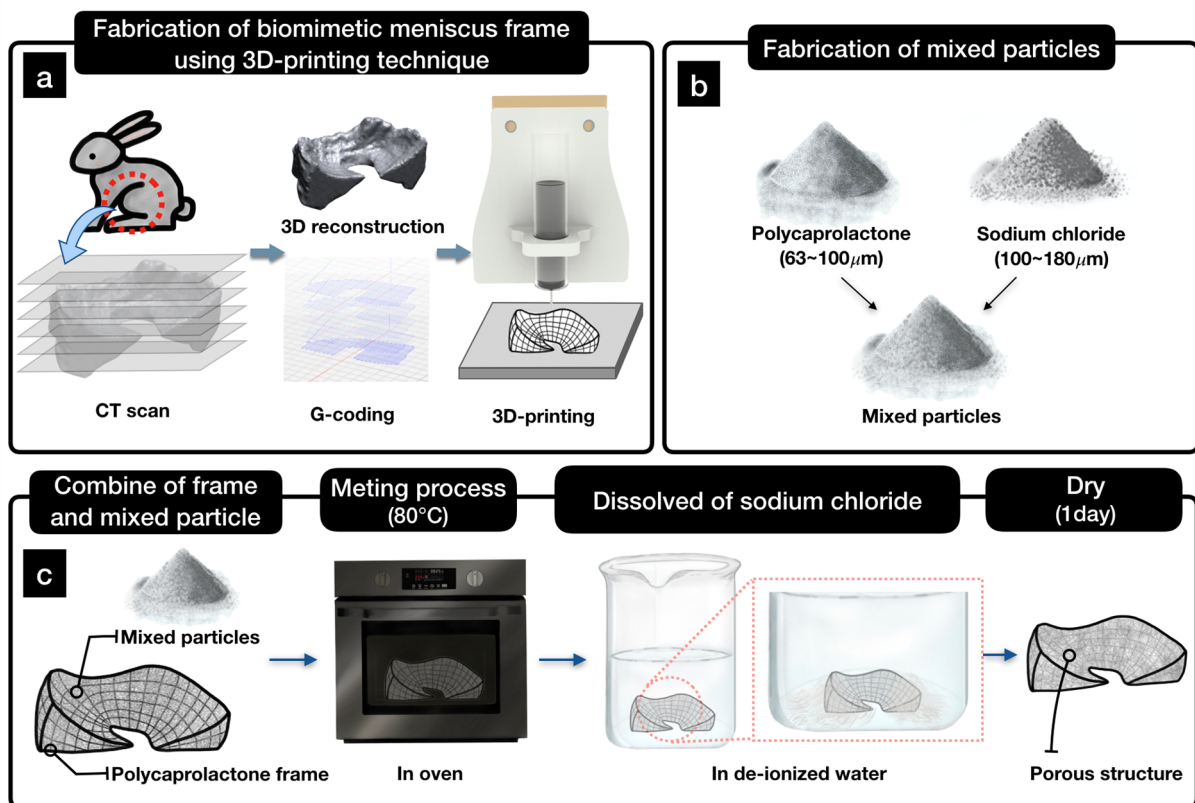

Supplemental Figure S1. Fabrication process of the biomimetic 3D-printed hybrid scaffold

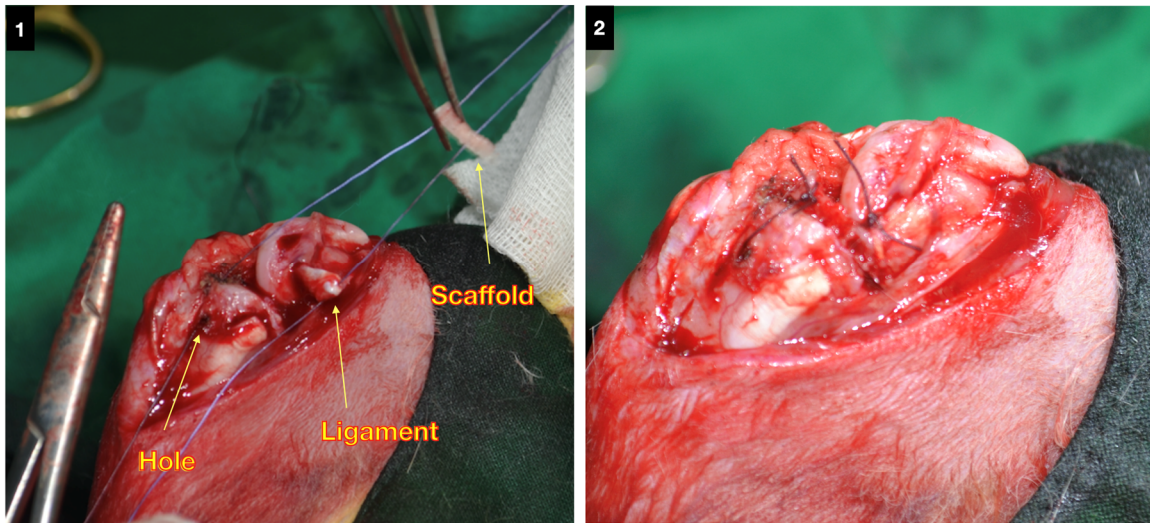

Supplemental Figure S2. Surgical procedure for hybrid-scaffolds, 1) anchored to medial aspects of the proximal tibia and midbody portion nearest from the MCL tibial for 2) fixation of hybrid-scaffold.
